# Supplementary material for: The Peptide AWRK6 Alleviates Lipid Accumulation in Hepatocytes by Inhibiting miR-5100 Targeting G6PC
Source: MDPI journal article supplement (doi:10.3390/ijms242216141), 2023-11-09
Supplement: s1 [file s1]

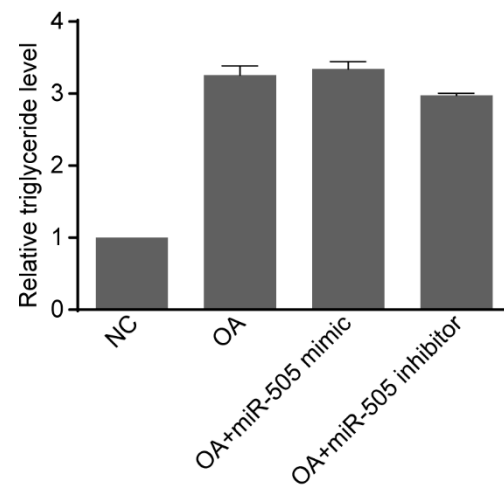

**Figure S1.** Triglyceride level was not altered by miR-505. The HepG2 cells were treated with oleic acid for 24 h, then transfected with miR-505 mimics and inhibitors. The triglyceride level was analyzed using Triglyceride Colorimetric Kit.
